# Supplementary material for: Fabrication of the magnetic mesoporous silica Fe-MCM-41-A as efficient adsorbent: performance, kinetics and mechanism
Source: PubMed Central journal article supplement (PMC7843643; doi:10.1038/s41598-021-81928-8), 2021-01-28
Supplement: 41598_2021_81928_MOESM1_ESM.pdf [file 41598_2021_81928_MOESM1_ESM.pdf]

**Manuscript Title:** Fabrication of the magnetic mesoporous silica Fe-MCM-41-A as efficient adsorbent: Performance, kinetics and mechanism

**Authors information:** Yige Guo<sup>1</sup>, Bin Chen<sup>2\*</sup>, Ying Zhao<sup>3</sup>, Tianxue Yang<sup>3\*</sup>

(1 College of Geology and Environment, Xian University of Science and Technology, Xian, 710054, China. 2 Shaanxi provincial Center for Disease Control and Prevention, Xian 710054, China. 3 State Key Laboratory of Environmental Criteria and Risk Assessment, Chinese Research Academy of Environmental Sciences, Beijing, 100012, China. Correspondence to [chenbin6121@163.com](mailto:chenbin6121@163.com) or 2316378041@qq.com)

## **Supplementary material:**

### **1. Preparation of MCM-41-A**

MCM-41-zeolite A (MCM-41-A) samples were synthesized using the impregnation assisted one-step crystallization method. Firstly, zeolite A precursors were prepared by mixing NaOH, NaAlO<sub>2</sub> and Na<sub>2</sub>SiO<sub>3</sub>•9H<sub>2</sub>O in a beaker. The molar ratio of SiO<sub>2</sub>: Al<sub>2</sub>O<sub>3</sub>: H<sub>2</sub>O: Na<sub>2</sub>O was set at 1: 0.83: 150: 1.15, these chemicals were added into the boiling water, stirred vigorously for 1h, and then aged at room temperature. Secondly, solution A was prepared by dissolving 4.37 g of CTAB into 30 ml of water; Solution B was prepared by dissolving 23.6 g of Na<sub>2</sub>SiO<sub>3</sub>•9H<sub>2</sub>O, 0.96 g of NaOH and 0.4 g of NaAlO<sub>2</sub> into 40 ml of water. Solutions A and B were then thoroughly mixed and added to 1% weight of zeolite A precursors. After 1h of vigorous stirring, the solution pH was adjusted to 10.5, and the mixture was transferred to a 200 mL polytetrafluoroethylene autoclave, crystallized at 105°C under constant stirring (30

rpm) for 48 h. The obtained solid product was filtered, rinsed with water until the washed water became neutral, then dried at 105°C for 12 h. Finally, the dried powder was calcined in air at 550°C for 4 h at a temperature ramping rate of 5°C min<sup>-1</sup> to obtain MCM-41-A.

## **2. Batch Experiments**

Batch experiments were performed using a series of 50 mL bottles covered with tin foil paper (avoid the photolysis of OTC). Fresh OTC stock solution (500 mg L<sup>-1</sup>) was prepared every time through adding a certain amount of OTC into distilled water. The pH values were adjusted by HCL or NaOH solutions. Then the solutions were mixed with 0.05 g of prepared Fe-MCM-41-A (except when the effect of dosage was investigated). The bottles were plugged with stoppers and continuously shaken (200 rpm) at 25°C (except when the effect of temperature was investigated). Sample solutions were filtered through a PES (polyethersulfone) micro-filtrate membrane (0.45 µm), and the OTC concentration was measured via high performance liquid chromatography (HPLC). Column: Pgrandsil-STC-C18, 5 µm, 100 Å, 4.6 mm × 250 mm; 0.01 M oxalic acid–acetonitrile (77:23, V/V) as mobile phase; flow velocity: 1.0 mL min<sup>-1</sup>; detector: UV at 364 nm; sample size: 20 µl. In this research, experiments were performed in triplicate and the results were presented as average values.

## **3. Computational details**

The removal efficiency and equilibrium adsorption quantity were calculated

according to Eqs. (1) and (2), respectively.

$$n (\%) = \frac{(C_0 - C_e)}{C_0} \times 100 \quad (1)$$

$$q_e = \frac{(C_0 - C_e)V}{W} \quad (2)$$

where  $n$  is the removal efficiency of OTC from the solution;  $q_e$  ( $\text{mg g}^{-1}$ ) is the adsorption capacity in the adsorbent at equilibrium point;  $C_e$  and  $C_0$  ( $\text{mg L}^{-1}$ ) are the equilibrium and initial OTC concentrations of solution respectively;  $V$  (L) is the volume of aqueous solution and  $W$  (g) is the dosage of adsorbent.

The adsorption kinetics for adsorbent has been previously described by the pseudo-first-order and pseudo-second-order reactions. The linearized integral forms of both models are shown as Eqs. (3) and (4) respectively:

$$\log(q_e - q_t) = \log q_e - \frac{k_1}{2.303} t \quad (3)$$

$$\frac{t}{q_t} = \frac{1}{k_2 q_e^2} + \frac{t}{q_e} \quad (4)$$

where  $k_1$  ( $\text{min}^{-1}$ ) and  $k_2$  ( $\text{mg}^{-1} \text{min}^{-1}$ ) are the pseudo-first-order and pseudo-second-order rate constants respectively;  $q_e$  and  $q_t$  ( $\text{mg g}^{-1}$ ) are the amounts of OTC adsorbed at equilibrium and at time ( $t$ ) respectively.

The sorption equilibrium data are commonly correlated with Langmuir (Eqs. (5) and (6)) and Freundlich (Eq. (7)) models, as have been shown in previous reports.

$$\frac{C_e}{q_e} = \frac{1}{q_{\max} k} + \frac{1}{q_{\max}} C_e \quad (5)$$

$$R_L = \frac{1}{1 + kC_0} \quad (6)$$

$$\log q_e = \log K_f + \frac{1}{n} \log C_e \quad (7)$$

Where  $q_e$  ( $\text{mg g}^{-1}$ ) is the adsorption capacity at equilibrium;  $C_0$  and  $C_e$  ( $\text{mg L}^{-1}$ ) are

the initial and equilibrium OTC concentrations;  $k$  ( $\text{L mg}^{-1}$ ) is the Langmuir constant related to the adsorption energy; and  $q_{\text{max}}$  ( $\text{mg g}^{-1}$ ) is the theoretical adsorption capacity. The basic characteristic can be described by  $R_L$ , a dimensionless equilibrium parameter of  $0 < R_L < 1$  indicates favorable adsorption,  $R_L = 1$  indicates linear adsorption and  $R_L > 1$  indicates unfavorable adsorption.  $K_f$  ( $\text{mg g}^{-1}$ ) ( $\text{L mg}^{-1}$ ) $^{1/n}$  is the Freundlich constant, while  $n$  expresses the aggregation number of OTC molecules.

#### 4. Characterization of Fe-MCM-41-A

Supplement characterization of Fe-MCM-41-A including BET, XRD and

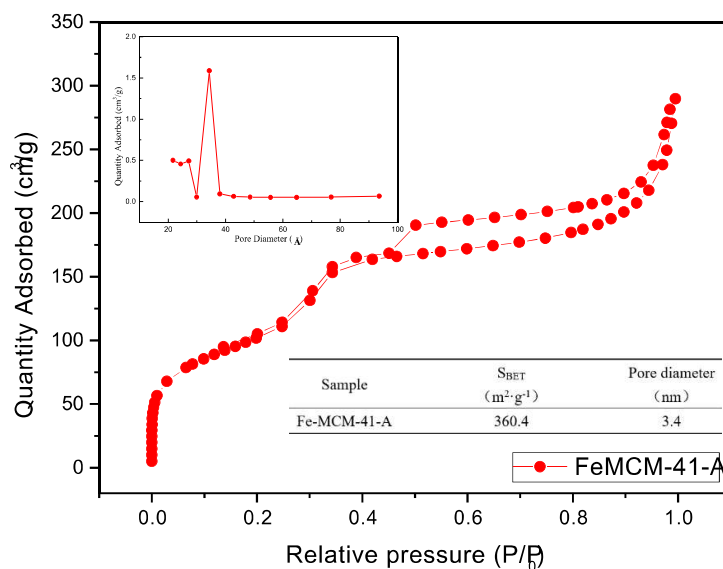

**Fig. 1S**  $\text{N}_2$  adsorption/desorption isotherms and inset with PSD curve of Fe-MCM-41-A

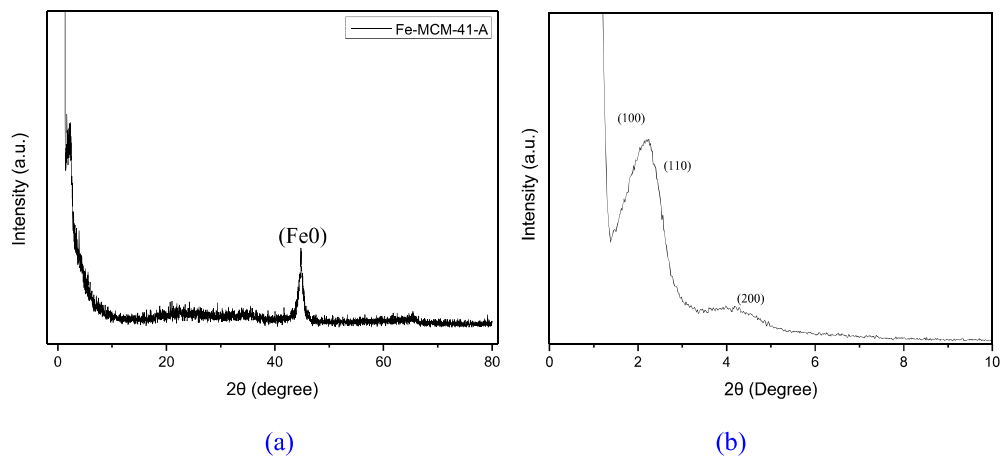

Fig. 2S X-ray diffraction of Fe-MCM-41-A: (a) 0.7-80° and (b) 0.7-10°

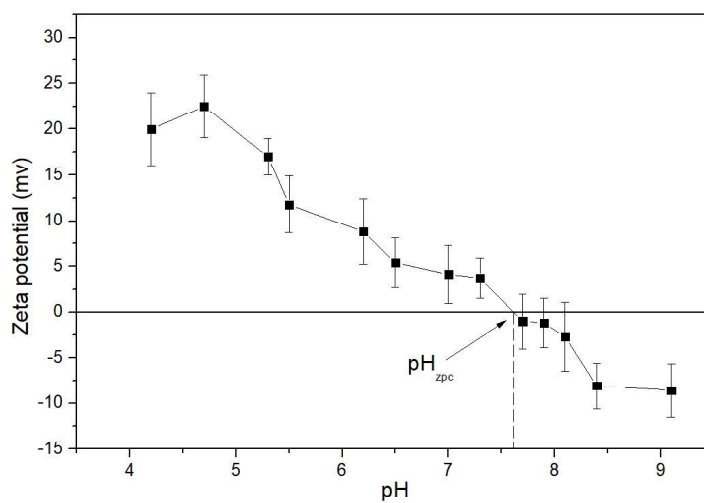

Fig.3S pH-Zeta of Fe-MCM-41-A

## 5. The physicochemical property of OTC

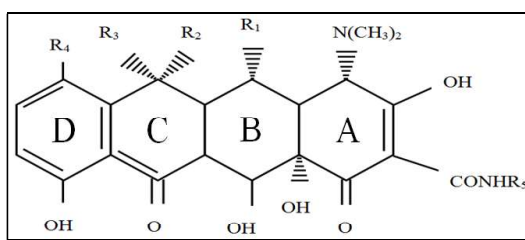

(a)

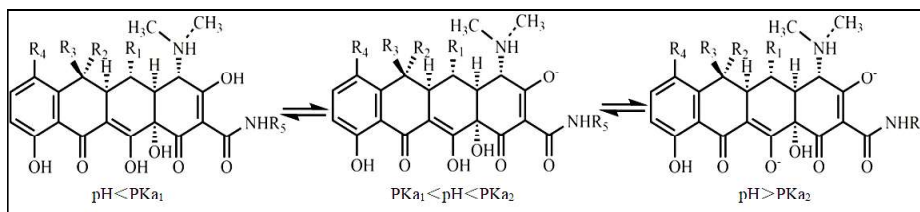

(b)

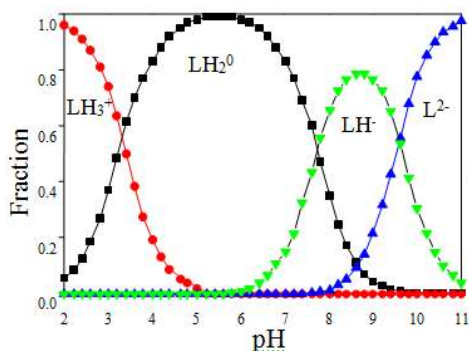

(c)

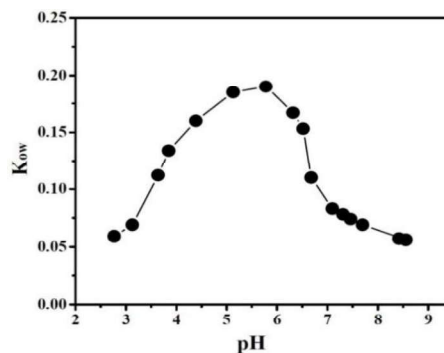

(d)

**Fig. 4S** (a) The molecular formula for TCs, (b) Surface charge of TCs, (c) Molecular specie of TCs, (d)  $K_{ow}$  of TCs with pH

## 6. Regeneration Experiment

The exhausted Fe-MCM-41-A was regenerated by ultrasonic vibration (22.5 kHz) in 100 mL of NaOH solution (0.01 M) for 30 min. After the samples were washed with water,  $\text{NaBH}_4$  solution was added dropwise and the washing procedure was repeated as described in section 2.2. The final adsorbent was then dried in vacuum environment at  $50^\circ\text{C}$  for 10 h. The regenerated adsorbent was transferred into 200 mL of  $100 \text{ mg L}^{-1}$  OTC solution for re-adsorption under the optimum adsorption conditions. This adsorption-desorption cycle was repeated five times in order to study the reusability of Fe-MCM-41-A.
